# Supplementary material for: Cellular stress induces non-canonical activation of the receptor tyrosine kinase EphA2 through the p38-MK2-RSK signaling pathway
Source: PubMed Central journal article supplement (PMC10196987; doi:10.1016/j.jbc.2023.104699), 2023-04-12
Supplement: mmc1.pdf [file mmc1.pdf]

# Supplementary Figure S1

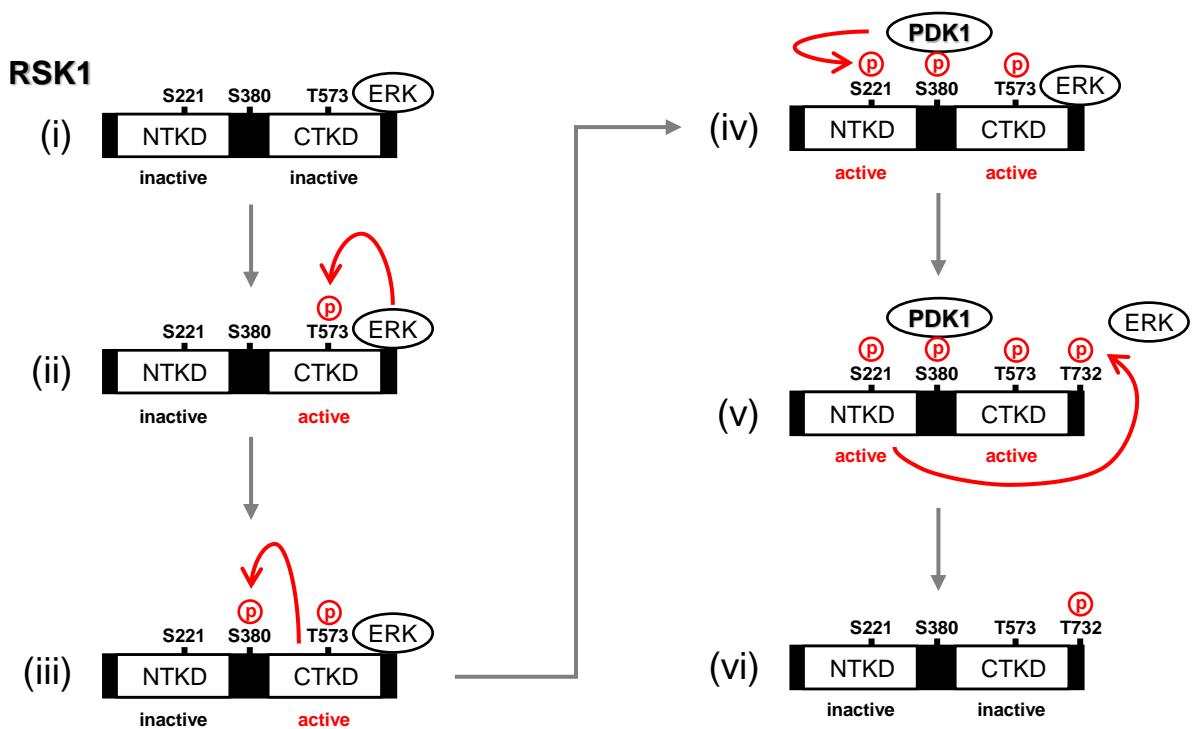

## Supplementary Figure S1. The activation and inactivation mechanisms of RSK1.

- (i) Active ERK binds to the docking site in the carboxyl-terminal.
- (ii) ERK phosphorylates Thr-573 to induce the activation of CTK.
- (iii) RSK1-CTK auto-phosphorylates Ser-380.
- (iv) PDK1 binds to phosphorylated Ser-380 and catalyzes the phosphorylation at Ser-221 to promote the activation of NTK.
- (v) NTK induces the phosphorylation at Thr-732, resulting in the detachment of ERK.
- (vi) Phosphatases dephosphorylate the phosphorylation to inactivate RSK1.

# Supplementary Figure S2

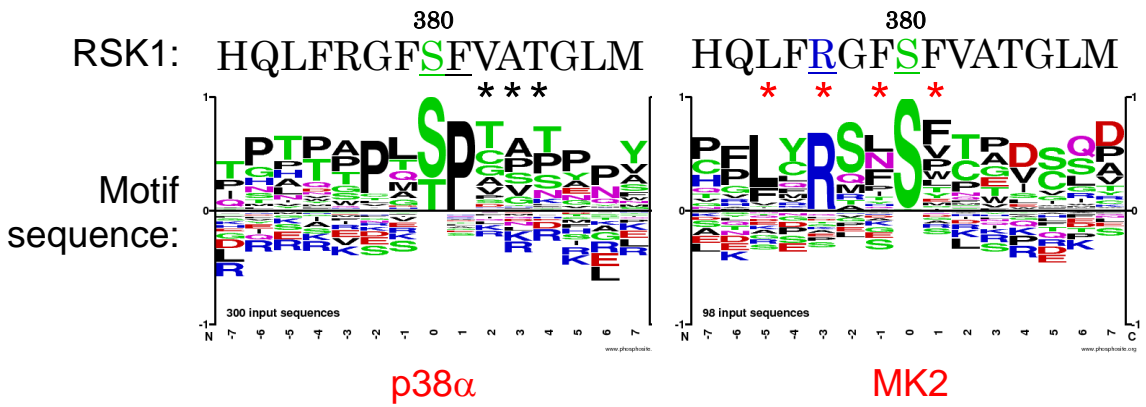

**Supplementary Figure S2. MK2 controls RSK phosphorylation to regulate the phosphorylation of EphA2 at Ser-897.**

Comparison of RSK1 amino acid sequence around Ser-380 with the substrate sequence motifs of p38 $\alpha$  and MK2. The substrate sequence motifs were obtained from PhosphoSitePlus (17).

# Supplementary Figure S3

**A**

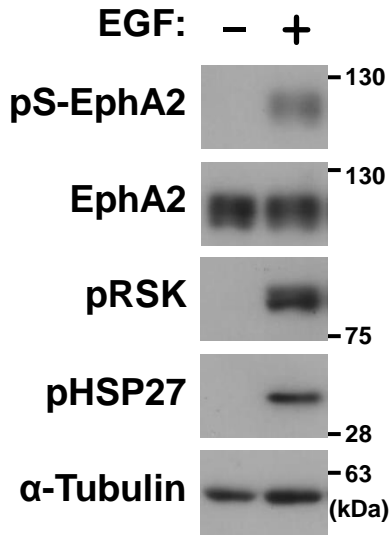

**B**

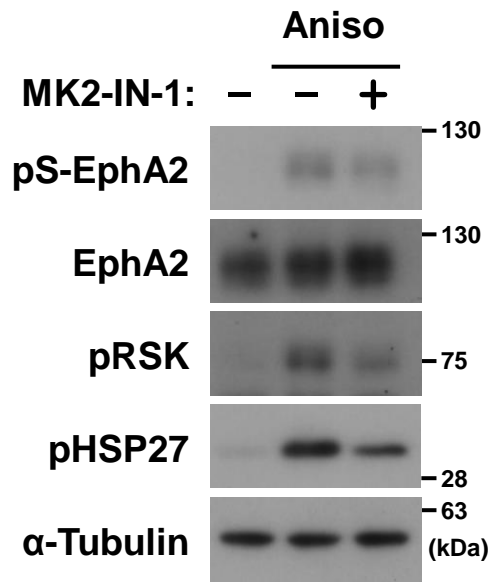

**C**

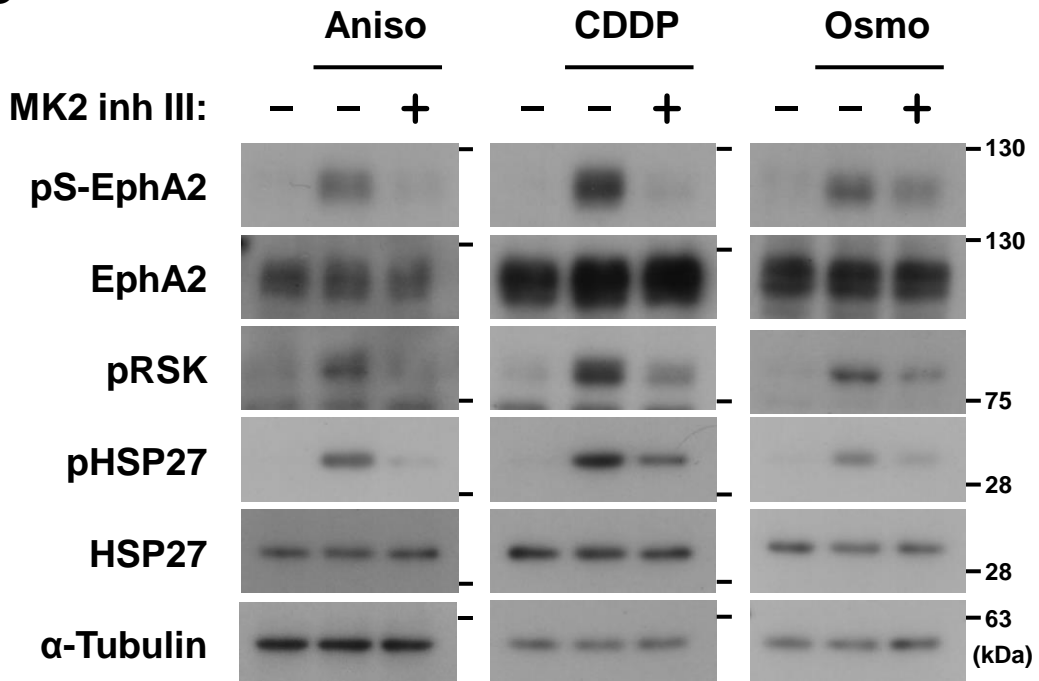

## Supplementary Figure S3. MK2 controls RSK phosphorylation to regulate the phosphorylation of EphA2 at Ser-897.

*A*, HeLa cells were treated with 100 ng/mL EGF for 10 min. *B*, HeLa cells were treated with 10  $\mu$ M MK2-IN-1 for 30 min and then stimulated with 50  $\mu$ M anisomycin for 20 min. *C*, HeLa cells were treated with 10  $\mu$ M MK2 inhibitor III and then stimulated with 50  $\mu$ M anisomycin for 20 min, 100  $\mu$ M CDDP for 3 h or 0.3 M NaCl for 10 min. Whole-cell lysates were immunoblotted with primary antibodies against pS-EphA2, EphA2, pRSK, pHSP27, HSP27, and  $\alpha$ -Tubulin.

# Supplementary Figure S4

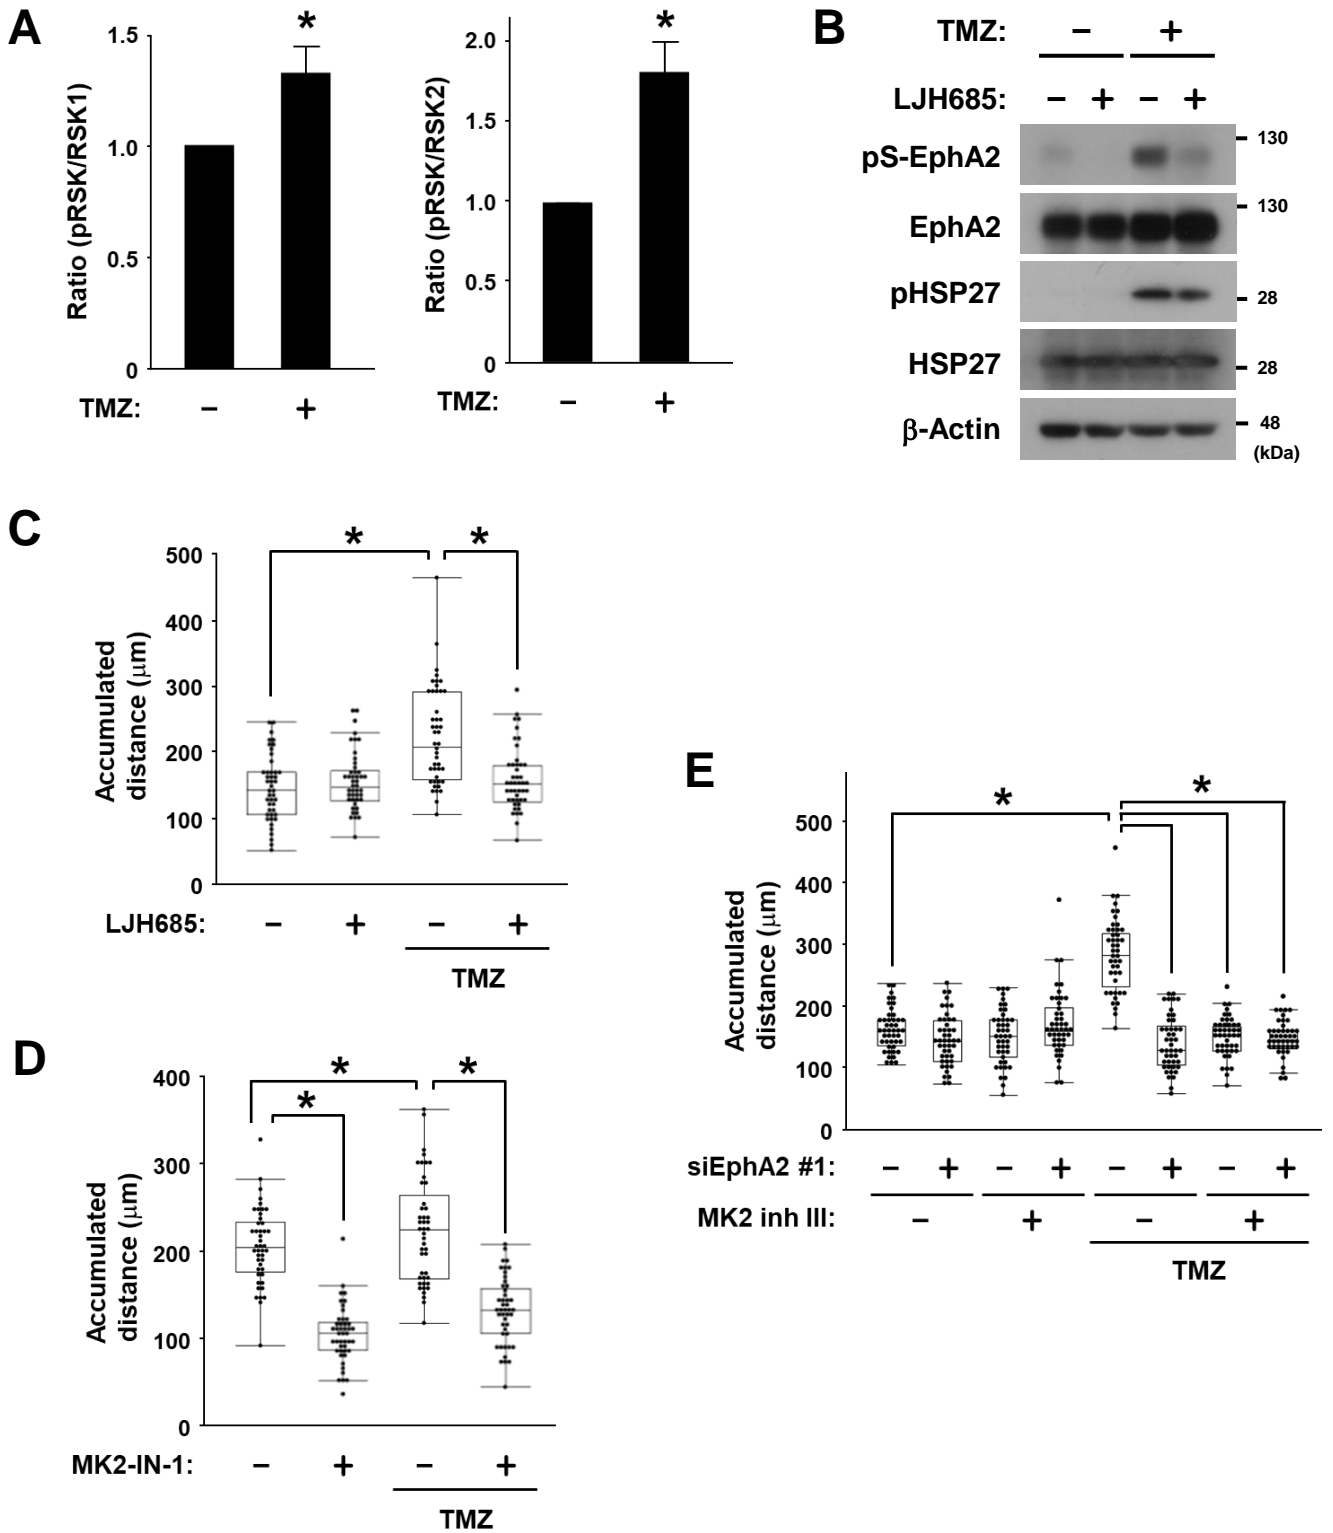

**Supplementary Figure S4. TMZ induces RSK phosphorylation and cell migration via the MK2-RSK pathway.**

*A*, Quantitative analysis of the immunoblotting data. The ratio of pRSK/RSK1 and pRSK/RSK2 of three replicates was presented. Values are given as the mean  $\pm$  SD. \* $P < 0.05$  by Student's *t*-test. *B*, U87-MG cells were treated with DMSO or 100  $\mu$ M temozolomide (TMZ) for 72 h, then treated with DMSO or 50  $\mu$ M LJH685 for 2 h. Whole-cell lysates were immunoblotted with primary antibodies against pS-EphA2, EphA2, pHSP27, HSP27 and  $\alpha$ -Tubulin. *C* and *D*, U87-MG cells were treated with DMSO or 100  $\mu$ M temozolomide (TMZ) for 72 h, then treated with DMSO, 50  $\mu$ M LJH685 (*C*) or 10  $\mu$ M MK2-IN-1 (*D*) for 2 h. *E*, U87-MG cells were transfected with siRNA against EphA2 (#1) or the negative control. After 5 h of transfection, cells were treated with DMSO or 100  $\mu$ M temozolomide (TMZ) for 72 h, then treated with DMSO, 10  $\mu$ M MK2 inhibitor III for 2 h. Cell migration was observed using a time-lapse imaging system for 120 min. The accumulated distance of cell migration ( $\mu$ m) was calculated and shown in box and whisker plots. \* $P < 0.05$  by the Tukey-Kramer HSD test.

# Supplementary Figure S5

**A**

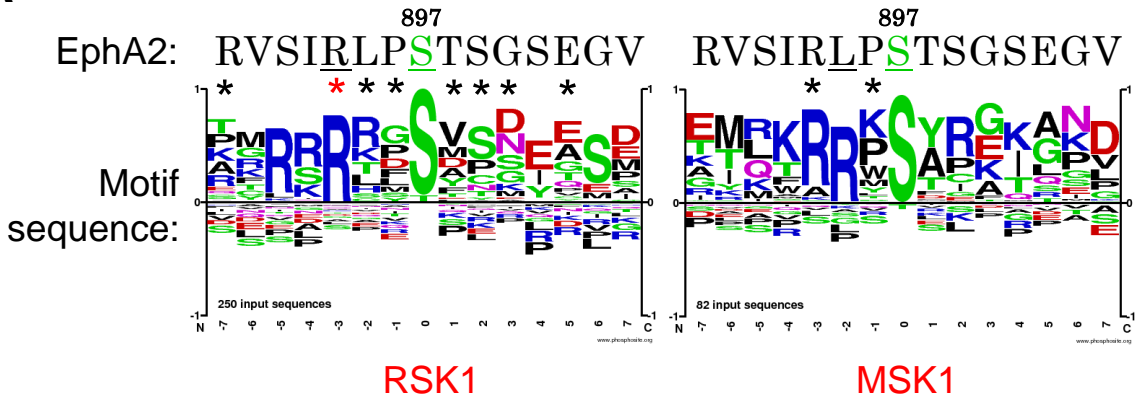

**B**

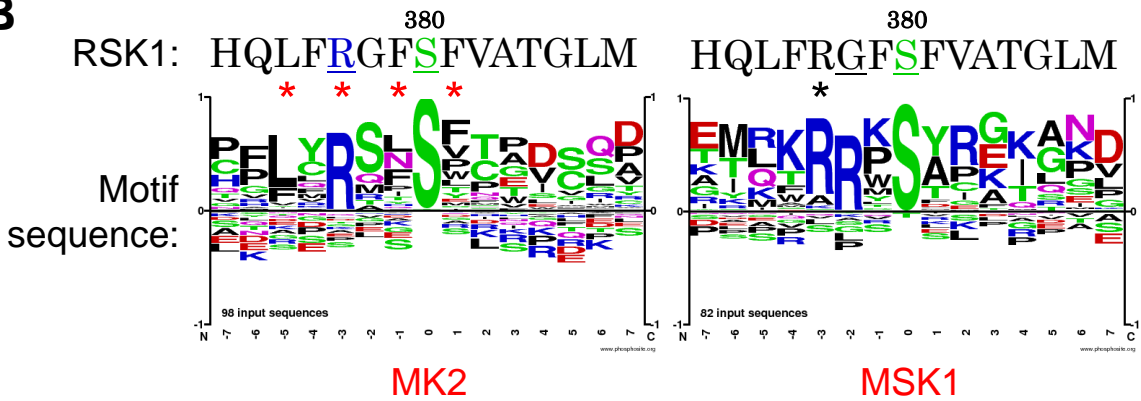

## Supplementary Figure S5. MSK has no contribution to the RSK-EphA2 pathway.

A, Comparison of EphA2 amino acid sequence around Ser-897 with the substrate sequence motifs of RSK1 and MSK1. B, Comparison of RSK1 amino acid sequence around Ser-380 with the substrate sequence motifs of MK2 and MSK1. The substrate sequence motifs were obtained from PhosphoSitePlus (17).

## Supplementary Figure S6

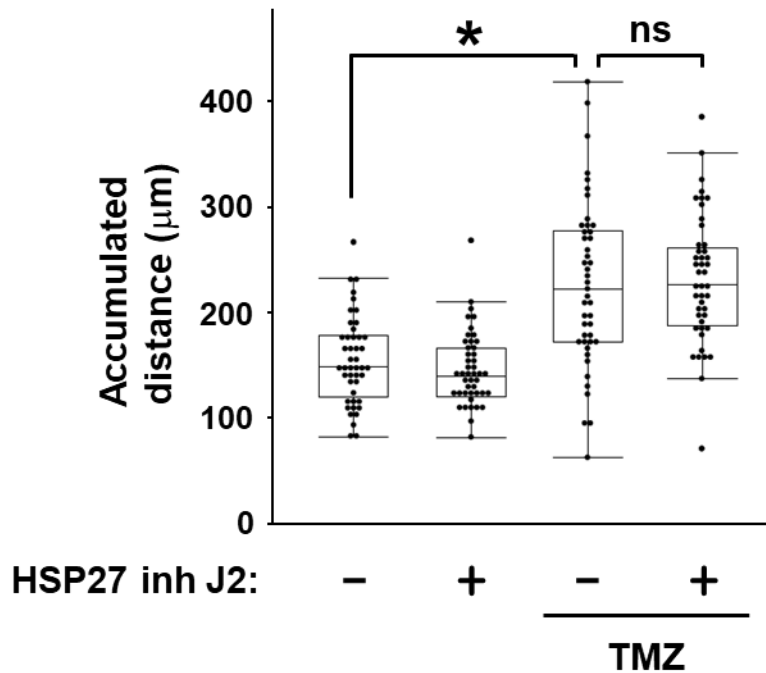

### Supplementary Figure S6. TMZ induces cell migration independent of HSP27.

U87-MG cells were treated with DMSO or 100 μM temozolomide (TMZ) for 72 h, then treated with DMSO or 10 μM HSP27 inhibitor J2 for 2 h. Cell migration was observed using a time-lapse imaging system for 120 min. The accumulated distance of cell migration (μm) was calculated and shown in box and whisker plots. \* $P < 0.05$  by the Tukey-Kramer HSD test.

# Supplementary Figure S7

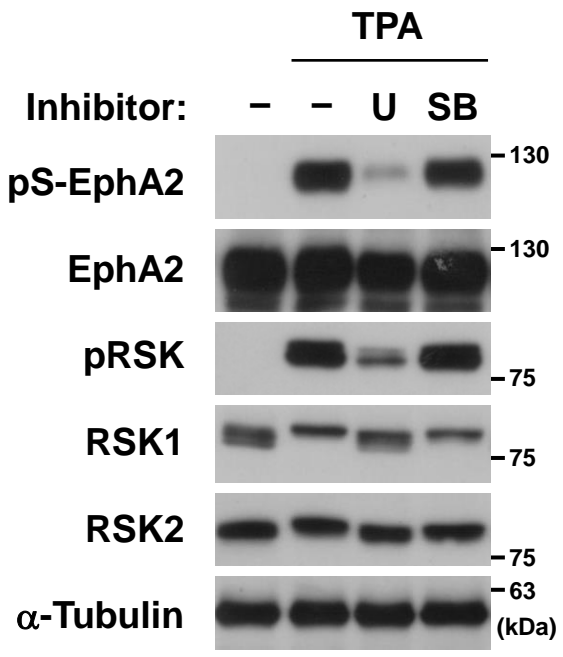

**Supplementary Figure S7. TPA induces the RSK-EphA2 pathway not via p38.**

HeLa cells were treated with 10  $\mu$ M U0126 (U) or SB203580 (SB) for 30 min, and then stimulated with 100 nM TPA for 10 min. Whole-cell lysates were immunoblotted with primary antibodies against pS-EphA2, EphA2, pRSK, RSK1, RSK2, and  $\alpha$ -Tubulin.



# Supplementary EXPERIMENTAL PROCEDURES

## Reagents

RSK inhibitor LHJ685, MK2 inhibitor MK2-IN-1, and HSP27 inhibitor J2 were obtained from MedChemExpress; 12-O-tetradecanoylphorbol 13-acetate (TPA) was from Wako Pure Chemical Industries.
